# Supplementary material
Source: publisher site journal article supplement (https://www.spandidos-publications.com/7355/downloadSupplementary)
Supplement: Supplementary file 1 [file downloadSupplementary]

Table SI. Primer sequences for cell transfection.

| Primer                      | Sequence (5'-3')       |
|-----------------------------|------------------------|
| miR-125b-5p mimic sense     | UCCCUGAGACCCUAACUUGUGA |
| miR-125b-5p mimic antisense | ACAAGUUAGGGUCAGGGAUU   |
| mimic NC sense              | UUCUCCGACGUGUCACGUTT   |
| mimic NC antisense          | ACGUGACACGUUCGGAGAATT  |
| si-DDX5 sense               | GCAAGUAGCUGCUGAAUAAUUU |
| si-DDX5 antisense           | AUAUUCAGCAGCUACUCUCUU  |
| si-NC sense                 | UUCUCCGAACGUGUCCGUTT   |
| si-NC antisense             | ACGUGACACGUUCGGAGAATT  |

NC, negative control; si, small interfering; miR-125b-5p, microRNA-125b-5p; DDX5, DEAD-box helicase 5.

Table SII. Primer sequences for genes in PCR.

| Gene                | Sequence (5'-3')          |
|---------------------|---------------------------|
| miR-125b-5p forward | TCCCTGAGACCCTAACTTGTGA    |
| miR-125b-5p reverse | AGTCTCAGGGTCCGAGGTATTC    |
| DDX5 forward        | GGCGCACAGCACAAGAGG        |
| DDX5 reverse        | ATGGCAGGAAGCAAATAAGACAA   |
| U6 forward          | GCTTCGGCAGCACATATACTAAAAT |
| U6 reverse          | CGCTTCACGAATTTGCGTGTTCAT  |
| GAPDH forward       | GGAGCGAGATCCCTCCAAAAT     |
| GAPDH reverse       | TGTAGACCATGTAGTTGAGGTCA   |

miR-125b-5p, microRNA-125b-5p; DDX5, DEAD-box helicase 5.
